# Supplementary material
Source: PubMed Central journal article supplement (PMC5557037)
Supplement: NIHMS864539-supplement-1.pdf [file NIHMS864539-supplement-1.pdf]

Feasibility of PRO-CTCAE in a Phase 2 XXXX Trial

**Supplemental Table S1.** Generic structure of PRO-CTCAE items and response options. Each item includes a plain language term for the AE of interest. The default recall reference period is “the past 7 days”.

| <b>Attribute</b> | <b>Question Structure</b>                                                | <b>Response Options</b>                                        |
|------------------|--------------------------------------------------------------------------|----------------------------------------------------------------|
| Frequency        | How <b>OFTEN</b> did you have _____?                                     | Never / Rarely / Occasionally / Frequently / Almost constantly |
| Severity         | What was the <b>SEVERITY</b> of your _____ at its <b>WORST</b> ?         | None / Mild / Moderate / Severe / Very severe                  |
| Interference     | How much did _____ <b>INTERFERE</b> with your usual or daily activities? | Not at all / A little bit / Somewhat / Quite a bit / Very much |
