# Supplementary material
Source: PubMed Central journal article supplement (PMC5557037)
Supplement: NIHMS864539-supplement-2.pdf [file NIHMS864539-supplement-2.pdf]

**Supplemental Table S2.** List of PRO-CTCAE items included in Trial XXXX

| <b>PRO-CTCAE Term</b>                                                              | <b>Measured Attributes</b>        | <b>Corresponding CTCAE Term</b> |
|------------------------------------------------------------------------------------|-----------------------------------|---------------------------------|
| Anxiety                                                                            | Frequency, severity, interference | Anxiety                         |
| Constipation                                                                       | Severity                          | Constipation                    |
| Cough                                                                              | Severity, interference            | Cough                           |
| Decreased appetite                                                                 | Severity, interference            | Anorexia                        |
| Dry mouth                                                                          | Severity                          | Dry mouth                       |
| Dry skin                                                                           | Severity                          | Dry skin                        |
| Difficulty swallowing                                                              | Severity                          | Dysphagia                       |
| Fatigue, tiredness, or lack of energy                                              | Severity, interference            | Fatigue                         |
| Feelings that nothing could cheer you up                                           | Frequency, severity, interference | Depression                      |
| Sad or unhappy feelings                                                            | Frequency, severity, interference | Depression                      |
| Headache                                                                           | Frequency, severity, interference | Headache                        |
| Heartburn                                                                          | Frequency, severity               | Dyspepsia                       |
| Hiccups                                                                            | Frequency, severity               | Hiccups                         |
| Hives (itchy red bumps on the skin)                                                | Presence                          | Urticaria                       |
| Hoarse voice                                                                       | Severity                          | Hoarseness                      |
| Insomnia (including difficulty falling asleep, staying asleep, or waking up early) | Severity, interference            | Insomnia                        |
| Itchy skin                                                                         | Severity                          | Pruritus                        |
| Loose or watery stools (diarrhea)                                                  | Frequency                         | Diarrhea                        |
| Mouth or throat sores                                                              | Severity, interference            | Mucositis oral                  |
| Nausea                                                                             | Frequency, severity               | Nausea                          |
| Pain                                                                               | Frequency, severity, interference | Pain                            |
| Problems with concentration                                                        | Severity, interference            | Concentration impairment        |
| Problems with memory                                                               | Severity, interference            | Memory impairment               |
| Problems with tasting food or drink                                                | Severity                          | Dysgeusia                       |
| Rash                                                                               | Presence                          | Rash maculo-papular             |
| Shortness of breath                                                                | Severity, interference            | Dyspnea                         |
| Skin burns from radiation                                                          | Severity                          | Dermatitis radiation            |
| Unusual darkening of the skin                                                      | Presence                          | Skin hyperpigmentation          |
| Voice changes                                                                      | Presence                          | Voice alteration                |
| Vomiting                                                                           | Frequency, severity               | Vomiting                        |
| Wheezing (whistling noise in the chest with breathing)                             | Severity                          | Wheezing                        |
